# Supplementary material
Source: Springer Nature journal article supplement (https://www.springermedizin.de/resource/supplementary/12936_2008_620_MOESM5_ESM.pdf/9547840)
Supplement: MOESM5 [file 9547840]

## Net Ownership and Type of net by Number of nets in households

| Number of<br>nets | Net Ownership           |      |           |      |       |      |                |     |
|-------------------|-------------------------|------|-----------|------|-------|------|----------------|-----|
|                   | Households with Any net |      |           |      |       |      | All Households |     |
|                   | Treated                 |      | Untreated |      | Total |      | (n)            | (%) |
|                   | (n)                     | (%)  | (n)       | (%)  | (n)   | (%)  |                |     |
| Only one net      | 266                     | 5.3  | 384       | 7.7  | 650   | 13.0 | 4985           | 100 |
| More than one     | 235                     | 4.7  | 308       | 6.2  | 543   | 10.9 | 4985           | 100 |
| At least one      | 501                     | 10.1 | 692       | 13.9 | 1193  | 23.9 | 4985           | 100 |
